# Supplementary material for: Low-Temperature Aging Provides 22% Efficient Bromine-Free and Passivation Layer-Free Planar Perovskite Solar Cells
Source: PubMed Central journal article supplement (PMC7770720; doi:10.1007/s40820-020-00418-0), 2020-04-03
Supplement: 40820_2020_418_MOESM1_ESM.pdf [file 40820_2020_418_MOESM1_ESM.pdf]

Supporting Information for

## Low-Temperature Aging Provides 22% Efficient Bromine-Free and Passivation Layer-Free Planar Perovskite Solar Cells

Xin Wang<sup>1</sup>, Luyao Wang<sup>1</sup>, Tong Shan<sup>2</sup>, Shibing Leng<sup>1</sup>, Hongliang Zhong<sup>2</sup>, Qinye Bao<sup>3</sup>, Zheng-Hong Lu<sup>4\*</sup>, Lin-Long Deng<sup>5\*</sup>, Chun-Chao Chen<sup>1\*</sup>

<sup>1</sup>School of Material Science and Engineering, Shanghai Jiao Tong University, Shanghai 200240, People's Republic of China

<sup>2</sup>School of Chemistry and Chemical Engineering, Shanghai Jiao Tong University, Shanghai 200240, People's Republic of China

<sup>3</sup>Key Laboratory of Solar Materials and Devices, Department of Electronic Science, School of Physics and Electronic Science, East China Normal University, Shanghai 200240, People's Republic of China

<sup>4</sup>Department of Materials Science and Engineering, University of Toronto, 184 College Street, Toronto, ON, M5S 3E4, Canada

<sup>5</sup>Pen-Tung Sah Institute of Micro-Nano Science and Technology, Xiamen University, Xiamen 361005, People's Republic of China

\*Corresponding authors. E-mail: [zhenghong.lu@utoronto.ca](mailto:zhenghong.lu@utoronto.ca) (Zheng-Hong Lu), [denglinlong@xmu.edu.cn](mailto:denglinlong@xmu.edu.cn) (Lin-Long Deng), [c3chen@sjtu.edu.cn](mailto:c3chen@sjtu.edu.cn) (Chun-Chao Chen)

### Supplementary Figures and Tables

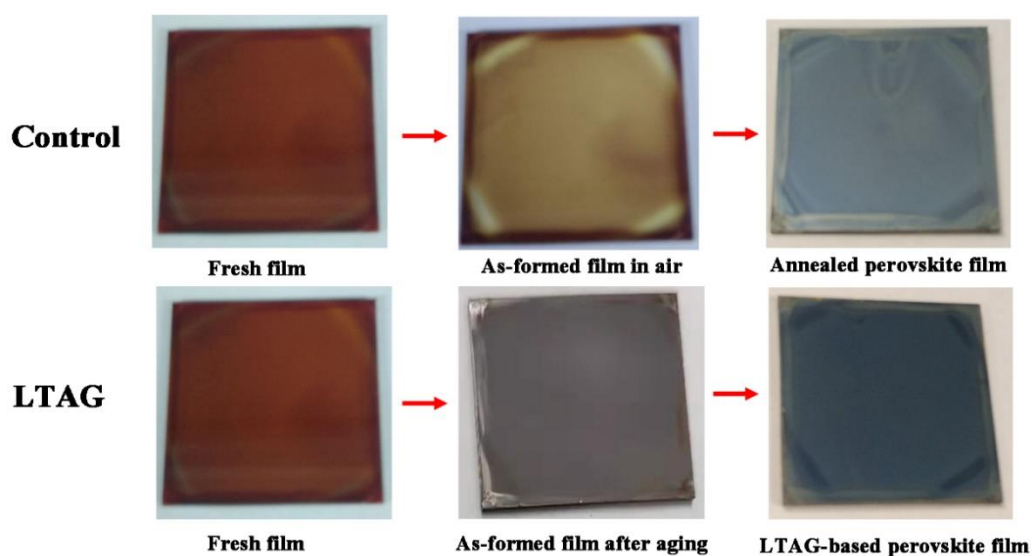

**Fig. S1** Photographs of perovskite films at various steps of the fabrication process, prepared using the control and LTAG-based processes

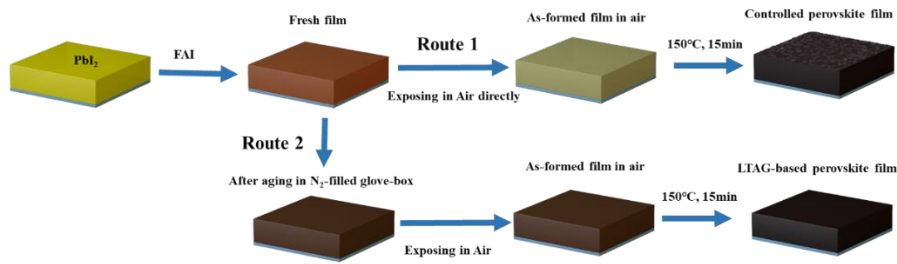

**Fig. S2** Schematic representation of the fabrication processes of perovskite films. Route 1: The control process without aging, resulting in too much  $\text{PbI}_2$  on the perovskite surface. Route 2: The LTAG method, resulting in a lower amount of  $\text{PbI}_2$  on the PVK surface

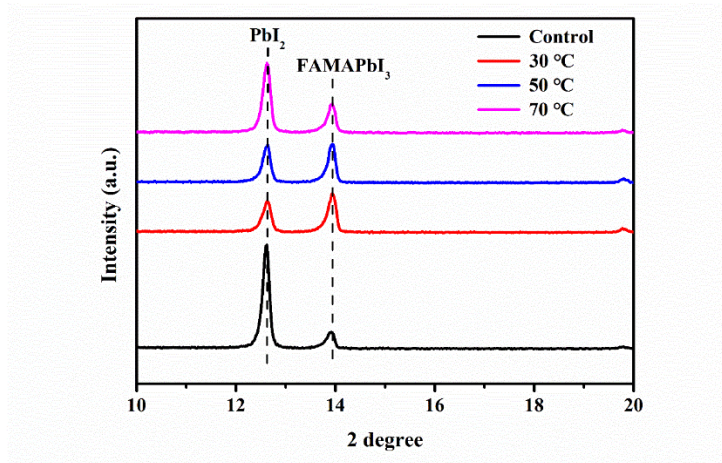

**Fig. S3** XRD patterns revealing the  $\text{PbI}_2$  (001) and perovskite (100) peaks obtained after applying the control process and the LTAG process at aging temperatures of 30, 50, and 70 °C

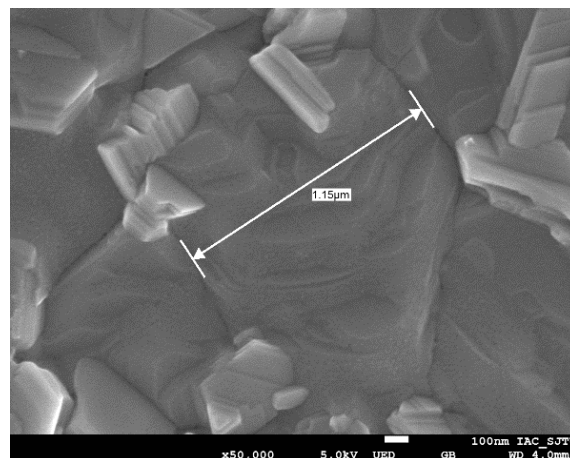

**Fig. S4** High-power scanning electron microscopy (SEM) image of the perovskite film obtained after aging treatment at 30 °C, revealing relatively large grains with sizes of up to 1.15  $\mu\text{m}$

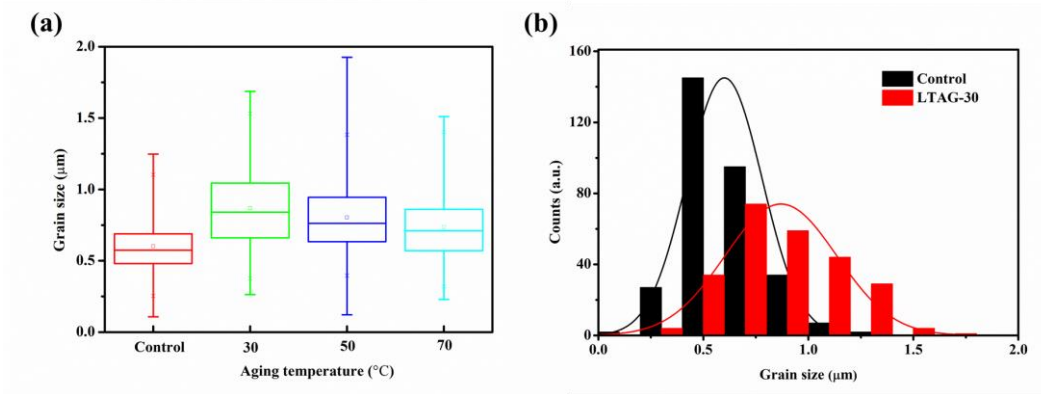

**Fig. S5** (a) Grain size distribution obtained from SEM images for perovskite films. Average perovskite size for the film without (control) and LTAG-treated films (at 30, 50, and 70  $^{\circ}\text{C}$ ) are 606 nm, 871 nm, 810 nm, 730 nm, respectively. (b) Grain statistics and Gaussian distribution fitting for control and LTAG-30 based films

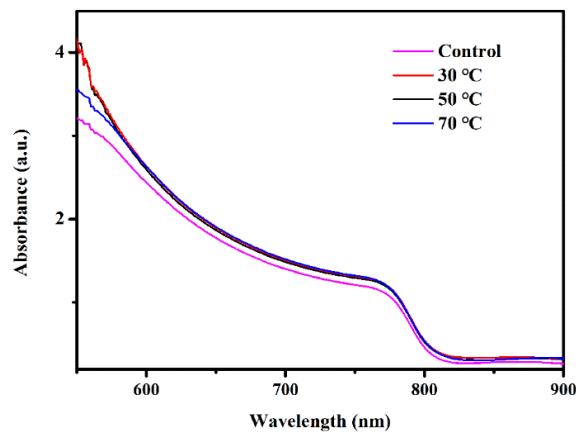

**Fig. S6** Absorption spectra of FAMAPbI<sub>3</sub> films prepared without (control) and with LTAG treatment (at 30, 50, and 70  $^{\circ}\text{C}$ ). Perovskite with LTAG-treated film shows a red shift near 810nm, indicating the visible band gaps of the LTAG-based FAMAPbI<sub>3</sub> perovskite films was slightly shifted to narrow bandgap (ca. 1.53 eV) with the decreased PbI<sub>2</sub> contents.

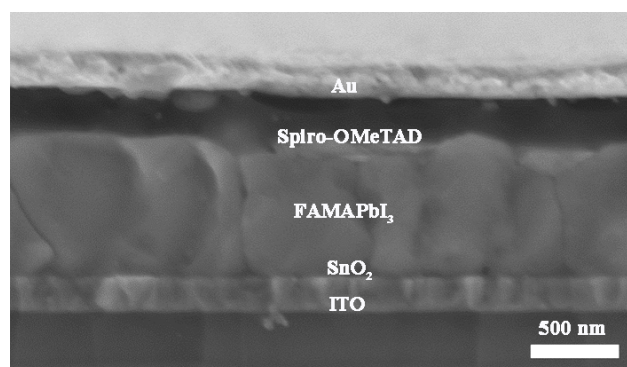

**Fig. S7** Cross-sectional SEM image of a completed perovskite device having the structure glass/ITO/SnO<sub>2</sub>/FAMAPbI<sub>3</sub>/Spiro-OMeTAD/Au

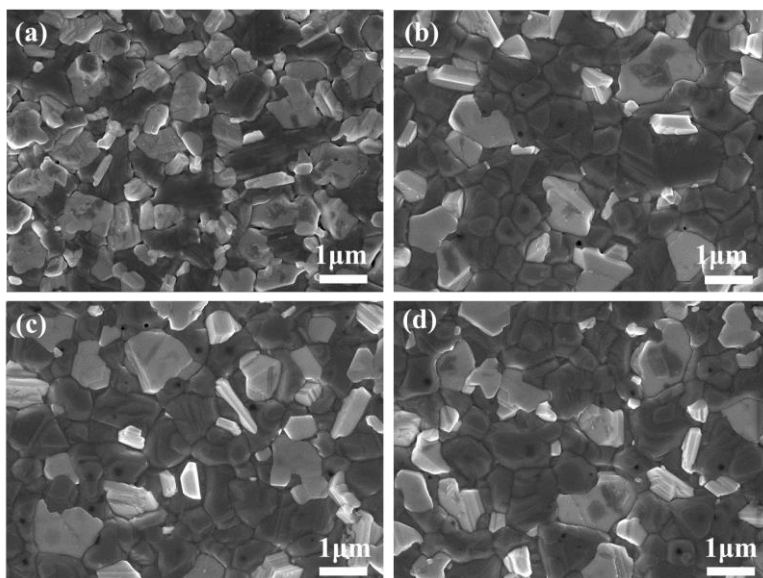

**Fig. S8** Top-view SEM images of annealed perovskite films with low-temperature aging process at varies time for (a) 2 min, (b) 5 min, (c) 10 min, and (d) 15 min

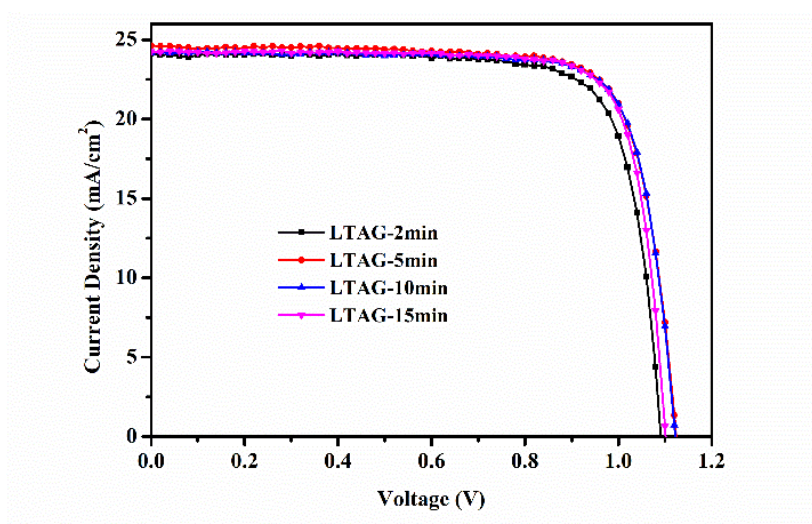

**Fig. S9**  $J$ - $V$  curves of devices prepared using LTAG method with different aging time (at 2 min, 5 min, 10 min and 15 min)

**Table S1** Device performance parameters for solar cells with low-temperature aging processed at varies aging time

| Aging time | $V_{oc}$ (V) | $J_{sc}$ (mA cm <sup>-2</sup> ) | FF (%) | PCE (%) |
|------------|--------------|---------------------------------|--------|---------|
| 2 min      | 1.08         | 24.12                           | 79.16  | 20.63   |
| 5 min      | 1.12         | 24.62                           | 78.20  | 21.57   |
| 10 min     | 1.12         | 24.24                           | 79.25  | 21.52   |
| 15 min     | 1.10         | 24.31                           | 80.03  | 21.40   |

**Table S2** Reported results for passivation layer-free FAPbI<sub>3</sub>-based planar PSCs

| ETL                                              | Perovskite composition                                                                                                             | Br content     | PCE (%)      | Year | Refs.     |
|--------------------------------------------------|------------------------------------------------------------------------------------------------------------------------------------|----------------|--------------|------|-----------|
| SC-CBD SnO <sub>2</sub>                          | Cs(FAPbI <sub>3</sub> ) <sub>0.83</sub> (MAPbBr <sub>3</sub> ) <sub>0.17</sub>                                                     | 17 %           | 20.7         | 2016 | [S1]      |
| SnO <sub>2</sub>                                 | (FAPbI <sub>3</sub> ) <sub>0.97</sub> (MAPbBr <sub>3</sub> ) <sub>0.03</sub>                                                       | 3 %            | 20.51        | 2016 | [S2]      |
| TiO <sub>2</sub> -Cl                             | FA <sub>0.85</sub> MA <sub>0.15</sub> PbI <sub>2.55</sub> Br <sub>0.45</sub>                                                       | 15 %           | 21.4         | 2017 | [S3]      |
| SnO <sub>2</sub> @a-TiO <sub>2</sub>             | FA <sub>0.85</sub> MA <sub>0.15</sub> PbI <sub>2.55</sub> Br <sub>0.45</sub>                                                       | 15 %           | 21.1         | 2017 | [S4]      |
| SnO <sub>2</sub>                                 | MA <sub>0.03</sub> FA <sub>0.97</sub> Pb(I <sub>0.97</sub> Br <sub>0.03</sub> ) <sub>3</sub>                                       | 3 %            | 21.6         | 2017 | [S5]      |
| C <sub>9</sub> -SnO <sub>2</sub>                 | (FAPbI <sub>3</sub> ) <sub>x</sub> (MAPbBr <sub>3</sub> ) <sub>1-x</sub>                                                           | 10 %           | 21.3         | 2018 | [S6]      |
| SnO <sub>2</sub> +KOH                            | Cs <sub>0.05</sub> (FA <sub>0.85</sub> MA <sub>0.15</sub> ) <sub>0.95</sub> Pb(I <sub>0.85</sub> Br <sub>0.15</sub> ) <sub>3</sub> | 15 %           | 20.5         | 2018 | [S7]      |
| SnO <sub>2</sub>                                 | Cs <sub>0.02</sub> MA <sub>0.03</sub> FA <sub>0.95</sub> Pb(I <sub>0.95</sub> Br <sub>0.05</sub> ) <sub>3</sub>                    | 5 %            | 22.0         | 2019 | [S8]      |
| NH <sub>4</sub> Cl-SnO <sub>2</sub>              | (FAPbI <sub>3</sub> ) <sub>0.97</sub> (MAPbBr <sub>3</sub> ) <sub>0.03</sub>                                                       | 3 %            | 21.38        | 2019 | [S9]      |
| ZnO                                              | FA <sub>0.83</sub> Cs <sub>0.17</sub> Pb(I <sub>0.83</sub> Br <sub>0.17</sub> ) <sub>3</sub>                                       | 17 %           | 21.1         | 2019 | [S10]     |
| SnO <sub>2</sub>                                 | (FAPbI <sub>3</sub> ) <sub>95</sub> (MAPbBr <sub>3</sub> ) <sub>5</sub> -MACl                                                      | 5%             | 22.51        | 2019 | [S11]     |
| SnO <sub>2</sub> -KCl                            | (FAPbI <sub>3</sub> ) <sub>x</sub> (MAPbBr <sub>3</sub> ) <sub>1-x</sub>                                                           | 3%             | 22.2         | 2020 | [S12]     |
| SnO <sub>2</sub>                                 | (FAPbI <sub>3</sub> ) <sub>0.92</sub> (MAPbBr <sub>3</sub> ) <sub>0.08</sub>                                                       | 8%             | 22.6         | 2020 | [S13]     |
| PTAA                                             | Cs <sub>0.05</sub> (FA <sub>0.92</sub> MA <sub>0.08</sub> ) <sub>0.95</sub> Pb(I <sub>0.92</sub> Br <sub>0.08</sub> ) <sub>3</sub> | 8%             | 22.3         | 2020 | [S14]     |
| SnO <sub>2</sub>                                 | FA <sub>0.95</sub> Cs <sub>0.05</sub> PbI <sub>3</sub>                                                                             | <b>Br-free</b> | 21.6         | 2018 | [S15]     |
| SnO <sub>2</sub>                                 | FA <sub>1-x</sub> MA <sub>x</sub> PbI <sub>3</sub>                                                                                 |                | 21.24        | 2019 | [S16]     |
| TiO <sub>2</sub>                                 | FA <sub>0.15</sub> MA <sub>0.85</sub> PbI <sub>3</sub>                                                                             |                | 21.38        | 2019 | [S17]     |
| In <sub>2</sub> O <sub>3</sub> /SnO <sub>2</sub> | FA <sub>1-x</sub> MA <sub>x</sub> PbI <sub>3</sub>                                                                                 |                | 22.54        | 2020 | [S18]     |
| SnO <sub>2</sub>                                 | FA <sub>1-x</sub> MA <sub>x</sub> PbI <sub>3</sub>                                                                                 |                | <b>22.41</b> | 2020 | This work |

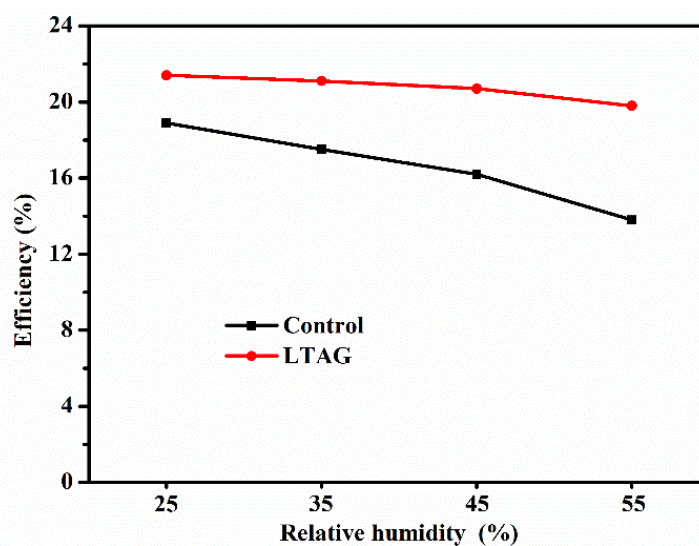**Fig. S10** Effects of relative humidity on control (without LTAG) and LTAG-based perovskite devices

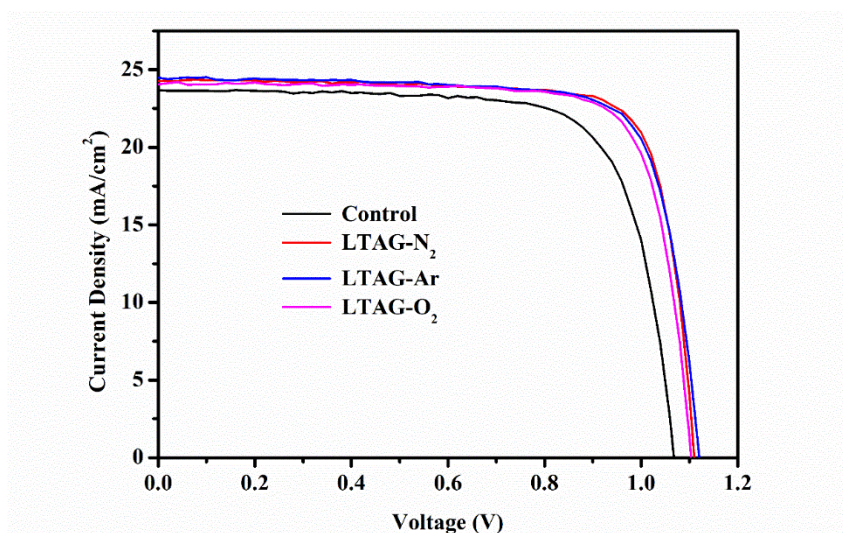

**Fig. S11**  $J$ - $V$  curves for perovskite samples prepared through LTAG treatment under various gases

**Table S3** Device performance parameters obtained from the  $J$ - $V$  curves of PSCs prepared through LTAG treatment under various gases

| LTAG-Perovskite | $V_{oc}$ (V) | $J_{sc}$ (mA cm <sup>-2</sup> ) | FF (%) | PCE (%) |
|-----------------|--------------|---------------------------------|--------|---------|
| Control         | 1.06         | 23.70                           | 74.47  | 18.71   |
| N <sub>2</sub>  | 1.12         | 24.28                           | 78.95  | 21.47   |
| Ar              | 1.12         | 24.52                           | 77.50  | 21.28   |
| O <sub>2</sub>  | 1.1          | 24.21                           | 78.42  | 20.89   |

**Table S4** Photovoltaic parameters obtained from the  $J$ - $V$  curves (both reverse and forward scans) of the control device and the LTAG-based solar cells. H-index was calculated using the equation  $H\text{-index} = (PCE_{\text{reverse}} - PCE_{\text{forward}})/PCE_{\text{reverse}}$ , where  $PCE_{\text{reverse}}$  and  $PCE_{\text{forward}}$  are the PCEs measured in the reverse and forward scan directions

|         | Scan Direction | $V_{oc}$<br>(V) | $J_{sc}$<br>(mA cm <sup>-2</sup> ) | FF<br>(%) | PCE<br>(%) | H-index<br>(%) |
|---------|----------------|-----------------|------------------------------------|-----------|------------|----------------|
| Control | Reverse        | 1.06            | 23.78                              | 76.98     | 19.41      | 10.2           |
|         | Forward        | 1.04            | 23.50                              | 71.32     | 17.43      |                |
| LTAG    | Reverse        | 1.12            | 24.39                              | 80.34     | 21.95      | 3.1            |
|         | Forward        | 1.1             | 24.29                              | 79.58     | 21.26      |                |

**Table S5**  $J$ - $V$  parameters of LTAG-30 devices recorded under illumination of 1 sun (AM1.5, 100 mW cm<sup>-2</sup>)

| Sample | $V_{oc}$ (V) | $J_{sc}$ (mA cm <sup>-2</sup> ) | FF (%) | PCE (%) |
|--------|--------------|---------------------------------|--------|---------|
| 1      | 1.12         | 24.38                           | 79.27  | 21.64   |
| 2      | 1.12         | 24.63                           | 78.207 | 21.57   |
| 3      | 1.12         | 24.24                           | 79.257 | 21.52   |
| 4      | 1.10         | 23.86                           | 79.85  | 20.95   |
| 5      | 1.10         | 24.71                           | 80.15  | 21.78   |
| 6      | 1.14         | 24.42                           | 78.89  | 21.94   |
| 7      | 1.12         | 24.39                           | 80.35  | 21.95   |
| 8      | 1.10         | 24.29                           | 79.59  | 21.26   |
| 9      | 1.12         | 24.79                           | 80.70  | 22.40   |
| 10     | 1.08         | 24.80                           | 76.75  | 20.56   |
| 11     | 1.12         | 24.40                           | 76.29  | 20.84   |
| 12     | 1.12         | 24.52                           | 77.50  | 21.28   |
| 13     | 1.12         | 24.28                           | 78.95  | 21.46   |
| 14     | 1.10         | 24.41                           | 79.06  | 21.23   |
| 15     | 1.12         | 24.14                           | 80.05  | 21.64   |
| 16     | 1.12         | 23.61                           | 79.67  | 21.06   |
| 17     | 1.10         | 23.08                           | 78.89  | 20.03   |
| 18     | 1.12         | 24.77                           | 79.34  | 22.01   |
| 19     | 1.10         | 24.31                           | 80.03  | 21.40   |
| 20     | 1.08         | 24.12                           | 79.16  | 20.63   |
| 21     | 1.10         | 22.71                           | 80.14  | 20.02   |
| 22     | 1.08         | 24.51                           | 78.95  | 20.89   |
| 23     | 1.10         | 24.67                           | 81.38  | 22.08   |
| 24     | 1.10         | 24.60                           | 78.53  | 21.25   |
| 25     | 1.12         | 24.35                           | 79.98  | 21.82   |
| 26     | 1.13         | 24.44                           | 80.52  | 22.24   |

|    |      |       |       |       |
|----|------|-------|-------|-------|
| 27 | 1.10 | 24.56 | 80.04 | 21.62 |
| 28 | 1.12 | 24.82 | 78.00 | 21.68 |
| 29 | 1.10 | 24.65 | 79.42 | 21.72 |
| 30 | 1.11 | 24.60 | 78.56 | 21.45 |
| 31 | 1.10 | 24.53 | 77.88 | 21.02 |
| 32 | 1.10 | 24.29 | 79.59 | 21.26 |

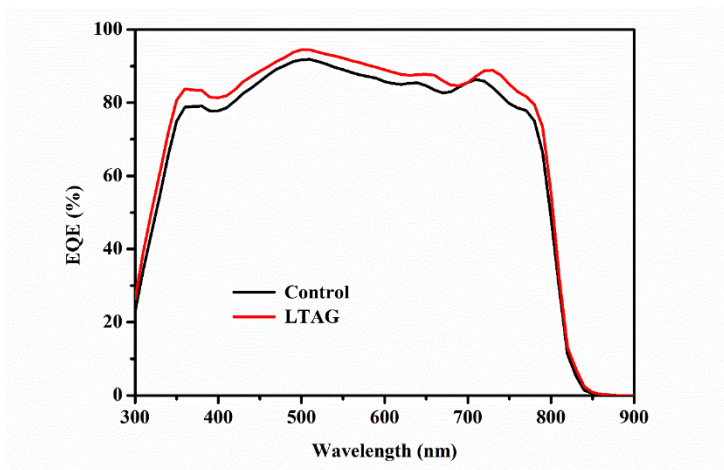

**Fig. S12** External quantum efficiency (EQE) spectra of the control device and the 30 °C-aged device featuring FAMAPI<sub>3</sub> as the absorber. The current densities for the control and LTAG-based devices, calculated from these curves, are 23.33 and 24.24 mA cm<sup>-2</sup>, respectively. Both values match well with the current densities measured from the *J*-*V* curves

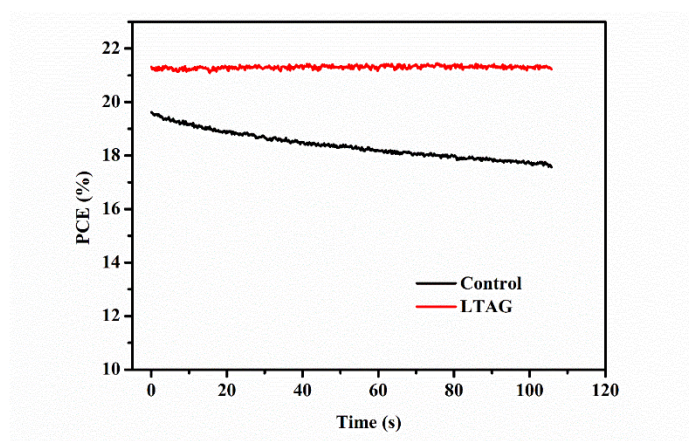

**Fig. S13** Steady state power outputs of the champion control and LTAG-based devices, measured close to the maximum power point. The stabilized current densities for the control and LTAG devices were 21.2 and 22.24 mA cm<sup>-2</sup>, respectively; their maximum voltages were 0.92 and 0.96 V, respectively. The steady state output increased from 19.5 to 21.4% after applying the LTAG process.



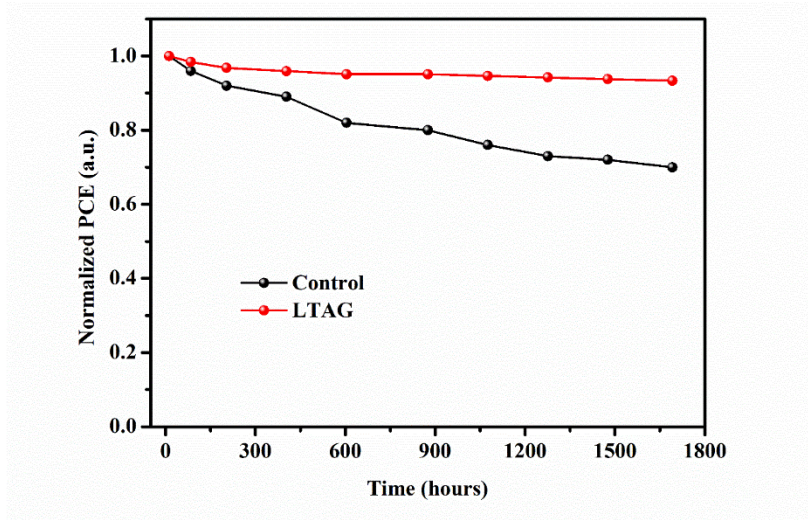

**Fig. S14** Storage stability tests for the control and LTAG-based perovskite devices, placed in a dry oven without encapsulation

**Table S6** Parameters obtained from time-resolved photoluminescence (TRPL) spectra of the control and LTAG-based perovskite films

|         | $\tau_1$ (ns) | $A_1$ (%) | $\tau_2$ (ns) | $A_2$ (%) | $\tau_{ave}$ (ns) |
|---------|---------------|-----------|---------------|-----------|-------------------|
| Control | 157.59        | 47.03     | 579.9         | 52.97     | 497.81            |
| LTAG    | 201.51        | 70.19     | 1119.26       | 29.81     | 846.03            |

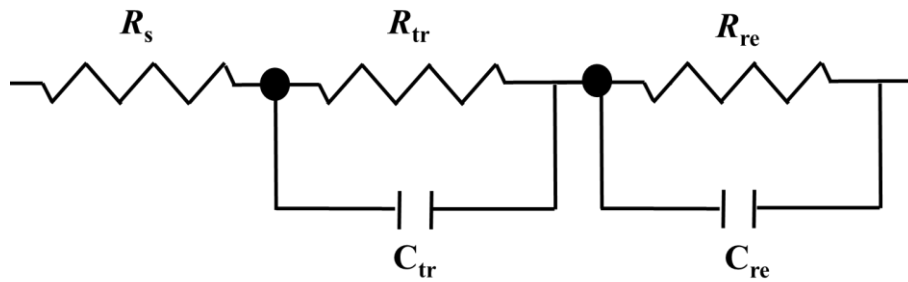

**Fig. S15** Equivalent circuit model for EIS. The equivalent circuit composed of series resistance and charge-recombination resistance

**Table S7** EIS parameters for the control and LTAG-based perovskite devices

| Perovskite | $R_{tr}$ ( $\Omega$ ) | $R_{re}$ ( $\Omega$ ) |
|------------|-----------------------|-----------------------|
| Control    | 32665                 | 146900                |
| LTAG       | 32325                 | 170500                |

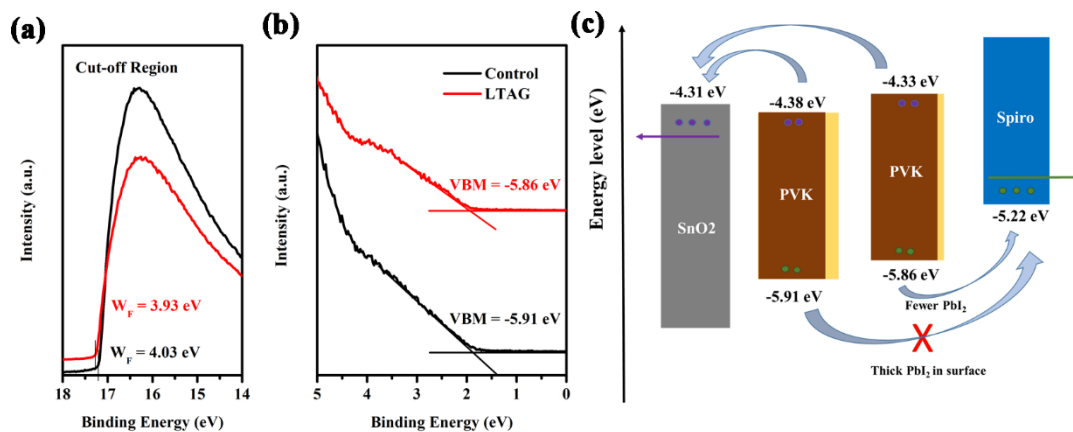

**Fig. S16** (a) Secondary electron cut-off region of the UPS spectra of the control and LTAG devices. (b) Valence band region of the UPS spectra of the control and LTAG devices. (c) Energy band alignments for perovskite films prepared with and without aging treatment

## Supplementary References

- [S1] E.H. Anaraki, A. Kermanpur, L. Steier, K. Domanski, T. Matsui et al., Highly efficient and stable planar perovskite solar cells by solution-processed tin oxide. *Energy Environ. Sci.* **9**(10), 3128-3134 (2016).  
<https://doi.org/10.1039/C6EE02390H>
- [S2] Q. Jiang, L. Zhang, H. Wang, X. Yang, J. Meng, Enhanced electron extraction using SnO<sub>2</sub> for high-efficiency planar-structure HC(NH<sub>2</sub>)<sub>2</sub>PbI<sub>3</sub>-based perovskite solar cells. *Nat. Energy* **2**, 16177 (2016).  
<https://doi.org/10.1038/nenergy.2016.177>
- [S3] H. Tan, A. Jain, O. Voznyy, X. Lan, F.P. García de Arquer, J.Z. Fan et al., Efficient and stable solution-processed planar perovskite solar cells via contact passivation. *Science* **355**(6326), 722-726 (2017).  
<https://doi.org/10.1126/science.aai9081>
- [S4] S. Song, G. Kang, L. Pyeon, C. Lim, G.-Y. Lee, T. Park, J. Choi, Systematically optimized bilayered electron transport layer for highly efficient planar perovskite solar cells ( $\eta = 21.1\%$ ). *ACS Energy Lett.* **2**(12), 2667-2673 (2017).  
<https://doi.org/10.1021/acsenenergylett.7b00888>
- [S5] Q. Jiang, Z. Chu, P. Wang, X. Yang, H. Liu et al., Planar-structure perovskite solar cells with efficiency beyond 21%. *Adv. Mater.* **29**(46), 1703852 (2017).  
<https://doi.org/10.1002/adma.201703852>

- [S6] K. Liu, S. Chen, J. Wu, H. Zhang, M. Qin., Fullerene derivative anchored SnO<sub>2</sub> for high-performance perovskite solar cells. *Energy Environ. Sci.* **11**(12), 3463-3471 (2018). <https://doi.org/10.1039/C8EE02172D>
- [S7] D. Yang, R. Yang, K. Wang, C. Wu, X. Zhu et al., High efficiency planar-type perovskite solar cells with negligible hysteresis using EDTA-complexed SnO<sub>2</sub>. *Nat. Commun.* **9**(1), 3239 (2018). <https://doi.org/10.1038/s41467-018-05760-x>
- [S8] Y. Zhao, Q. Li, W. Zhou, Y. Hou, Y. Zhao et al., Double-side-passivated perovskite solar cells with ultra-low potential loss. *Solar RRL* **3**(2), 1800296 (2019). <https://doi.org/10.1002/solr.201800296>
- [S9] Z. Liu, K. Deng, J. Hu, L. Li et al., Coagulated SnO<sub>2</sub> colloids for high-performance planar perovskite solar cells with negligible hysteresis and improved stability. *Angew. Chem. Int. Ed.* **131**(33), 11621-11628 (2019). <https://doi.org/10.1002/ange.201904945>
- [S10] K. Schutt, P.K. Nayak, A.J. Ramadan, B. Wenger, Y.-H. Lin, H.J. Snaith, Overcoming zinc oxide interface instability with a methylammonium-free perovskite for high-performance solar cells. *Adv. Func.Mater.* **29**(47), 1900466 (2019). <https://doi.org/10.1002/adfm.201900466>
- [S11] G. Yang, H. Zhang, G. Li, G. Fang, Stabilizer-assisted growth of formamndinium-based perovskites for highly efficient and stable planar solar cells with over 22% efficiency. *Nano Energy* **63**,103835 (2019). <https://doi.org/10.1016/j.nanoen.2019.06.031>
- [S12] P. Zhu, S. Gu, X. Luo, Y. Gao, S. Li, J. Zhu, H. Tan, Simultaneous contact and grain-boundary passivation in planar perovskite solar cells using SnO<sub>2</sub>-KCl composite electron transport layer. *Adv. Energy Mater.* **10**(3), 1903083 (2020). <https://doi.org/10.1002/aenm.201903083>
- [S13] R. Wang, J. Xue, K.-L. Wang, Z.-K. Wang, Y. Luo et al., Constructive molecular configurations for surface-defect passivation of perovskite photovoltaics. *Science* **366**(6472), 1509-1513 (2019). <https://doi.org/10.1126/science.aay9698>
- [S14] X. Zheng, Y. Hou, C. Bao, J. Yin, F. Yuan et al., Managing grains and interfaces via ligand anchoring enables 22.3%-efficiency inverted perovskite solar cells. *Nature Energy* (2020). <https://doi.org/10.1038/s41560-019-0538-4>
- [S15] T. Bu, J. Li, F. Zheng, W. Chen, X. Wen et al., Universal passivation strategy to slot-die printed SnO<sub>2</sub> for hysteresis-free efficient flexible perovskite solar

module. *Nat. Commun.* **9**(1), 4609 (2018). <https://doi.org/10.1038/s41467-018-07099-9>

[S16] Q. Jiang, Y. Zhao, X. Zhang, X. Yang, Y. Chen et al., Surface passivation of perovskite film for efficient solar cells. *Nat. Photonics* **13**(7), 460-466 (2019). <https://doi.org/10.1038/s41566-019-0398-2>

[S17] P. Cui, D. Wei, J. Ji, H. Huang, E. Jia et al., Planar p–n homojunction perovskite solar cells with efficiency exceeding 21.3%. *Nat. Energy* **4**(2), 150-159 (2019). <https://doi.org/10.1038/s41560-018-0324-8>

[S18] P. Wang, R. Li, B. Chen, F. Hou, J. Zhang, Y. Zhao, X. Zhang, Gradient energy alignment engineering for planar perovskite solar cells with efficiency over 23%. *Adv. Mater.* **32**(6), 1905766 (2020). <https://doi.org/10.1002/adma.201905766>
